# Supplementary material for: Pd–Co3[Co(CN)6]2 hybrid nanoparticles: preparation, characterization, and challenge for the Suzuki–Miyaura coupling of aryl chlorides under mild conditions
Source: Royal Society of Chemistry journal article supplement (doi:10.1039/c5dt03631c), 2015-11-11
Supplement: c5dt03631c1.pdf [file c5dt03631c1.pdf]

## Pd-Co<sub>3</sub>[Co(CN)<sub>6</sub>]<sub>2</sub> hybrid nanoparticles: Preparation, Characterization, and Challenging for the Suzuki–Miyaura coupling of aryl chlorides under mild conditions

Ren Li\*<sup>a</sup>, Ran Lia, Changlai Wanga, Lei Gaob, and Qianwang Chen\*<sup>ab</sup>

<sup>a</sup>Hefei National Laboratory for Physical Sciences at Microscale and Department of Materials Science & Engineering, & Collaborative Innovation Center of Suzhou Nano Science and Technology, University of Science and Technology of China, Hefei 230026, China

<sup>b</sup>High Magnetic Field Laboratory, Hefei Institutes of Physical Science, Chinese Academy of Sciences, Hefei 230031, China

**Table S1** Catalytic performance of different Pd-Based catalysts in the coupling reaction of chlorobenzene and phenylboronic acid in recent two years.

| Entry | catalyst                                                                                                  | solvent                             | time (h) | temp (°C) | yield (%) | ref       |
|-------|-----------------------------------------------------------------------------------------------------------|-------------------------------------|----------|-----------|-----------|-----------|
| 1     | Poly-NHC-2–Pd2                                                                                            | EtOH/H <sub>2</sub> O (3:2)         | 3        | 80        | 100       | 1         |
| 2     | PdNPs) H2P-CMP                                                                                            | TBAB-H <sub>2</sub> O               | 12       | 80        | 96        | 2         |
| 3     | Zwitterionic Palladium Complexes                                                                          | 1,4-dioxane/H <sub>2</sub> O (1:4). | 12       | r.t.      | 33        | 3         |
| 4     | HT-Pd(0)                                                                                                  | H <sub>2</sub> O                    | 4.5      | 100       | 95        | 4         |
| 5     | 2-(3-sulfonatomesityl)-5-sulfonatoindenyl) dicyclohexylphosphine hydrate-Pd(OAc) <sub>2</sub> sodium salt | H <sub>2</sub> O                    | 24       | 100       | 78        | 5         |
| 6     | Pd@[C12,C12–Im]Cl                                                                                         | H <sub>2</sub> O/p-dioxane (1:1)    | 10min    | r.t.      | 94        | 6         |
| 7     | PdCl <sub>2</sub> -L5                                                                                     | DMF                                 | 2        | 130       | 95        | 7         |
| 8     | Cyclometalated-2-Phenylimidazole Palladium Carbene Complexes                                              | EtOH                                | 1        | 60        | 96a       | 8         |
| 9     | Pd/PPhen solid composite                                                                                  | H <sub>2</sub> O                    | 3        | 80        | 82        | 9         |
| 10    | Pd(II) doped UiO-67                                                                                       | EtOH                                | 20       | 100       | 90        | 10        |
| 11    | palladium complexes 5h                                                                                    | dioxane                             | 1        | 80        | 70        | 11        |
| 12    | GO–NHC–Pd                                                                                                 | DMF–H <sub>2</sub> O(1:1)           | 1        | 80        | 65        | 12        |
| 13    | monoligated imine–Pd–NHC complexes                                                                        | PrOH/H <sub>2</sub> O = 10:1        | 2        | 80        | 98        | 13        |
| 14    | Palladium(II)-N-heterocyclic carbene complexes                                                            | DMF/H <sub>2</sub> O (1:1)          | 3        | 50        | 93        | 14        |
| 15    | [Pd(OAc) <sub>2</sub> ]-Resorcinarenyl-Phosphines                                                         | DMF                                 | 1        | 100       | 97        | 15        |
| 16    | Pd/Fe <sub>3</sub> O <sub>4</sub> @SiO <sub>2</sub> @KCC-1                                                | NMP                                 | 12       | 140       | 83        | 16        |
| 17    | CoAl–LDH/Pd                                                                                               | EtOH                                | 2        | 80        | 66        | 17        |
| 18    | Pd-Co <sub>3</sub> [Co(CN) <sub>6</sub> ] <sub>2</sub>                                                    | EtOH                                | 2        | 80        | 86        | This work |

Table 2. Catalytic Performance of Different Pd-Based Catalysts in the Coupling Reaction of chlorobenzene and Phenylbionic Acid

| Entry | catalyst                                                              | solvent | time (h) | temp (°C) | yield (%) |
|-------|-----------------------------------------------------------------------|---------|----------|-----------|-----------|
| 1     | Pd-Co <sub>3</sub> [Co(CN) <sub>6</sub> ] <sub>2</sub>                | EtOH    | 2        | 80        | 86        |
| 2     | Co <sub>3</sub> [Co(CN) <sub>6</sub> ] <sub>2</sub> @Pd               | EtOH    | 2        | 80        | 32        |
| 3     | Pd <sub>x</sub> Co <sub>3-x</sub> [Co(CN) <sub>6</sub> ] <sub>2</sub> | DMF     | 4        | 90        | 76        |
| 4     | Pd-Fe <sub>3</sub> O <sub>4</sub> @C <sup>[18]</sup>                  | DMF     | 4        | 100       | 82        |

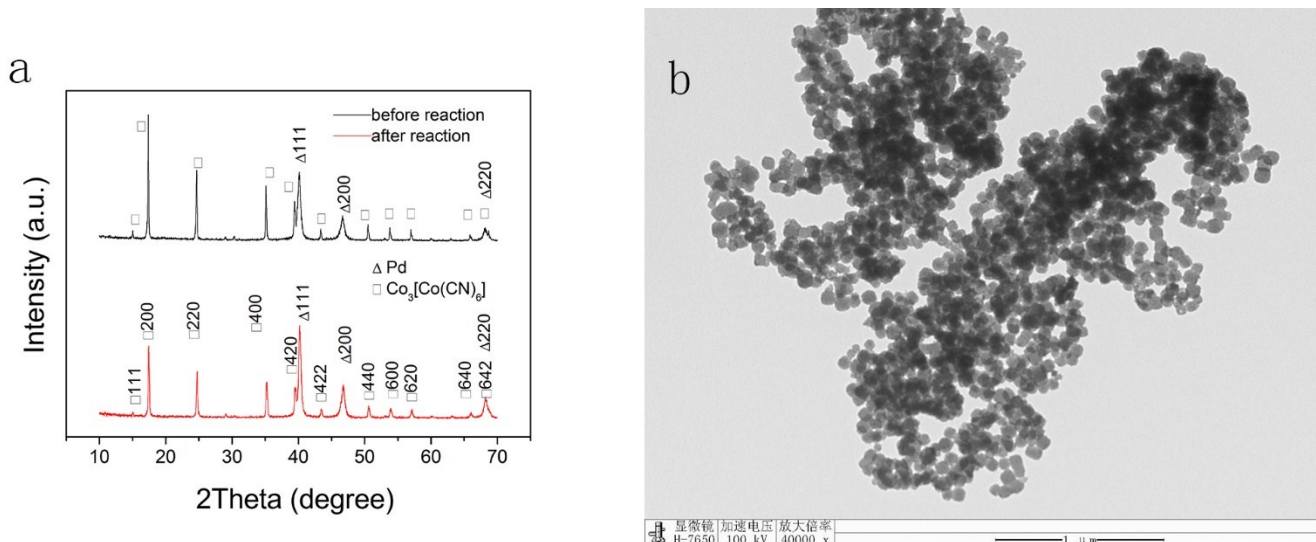

Figure 1. a) XRD pattern of Co<sub>3</sub>[Co(CN)<sub>6</sub>]<sub>2</sub>@Pd after reaction, b) TEM image of large scale Pd-Co<sub>3</sub>[Co(CN)<sub>6</sub>]<sub>2</sub> NPs after reaction.

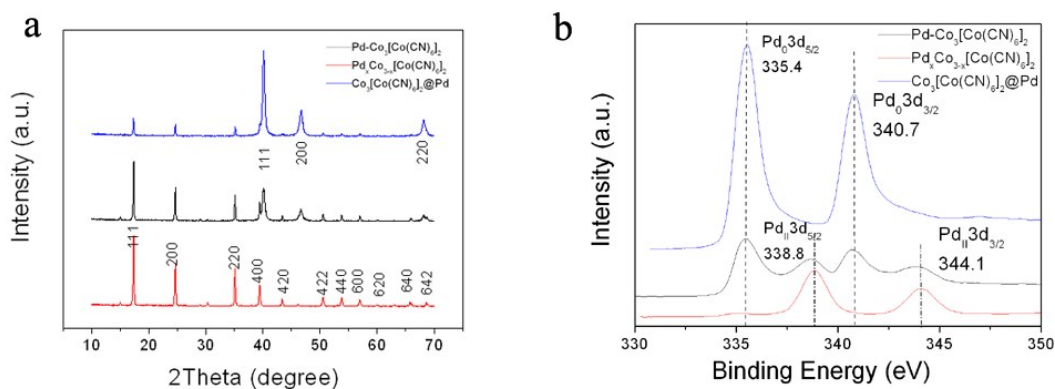

Figure 2. a) XRD pattern of Co<sub>3</sub>[Co(CN)<sub>6</sub>]<sub>2</sub>@Pd, b) XPS spectrum of Pd 3d spectrum in Co<sub>3</sub>[Co(CN)<sub>6</sub>]<sub>2</sub>@Pd

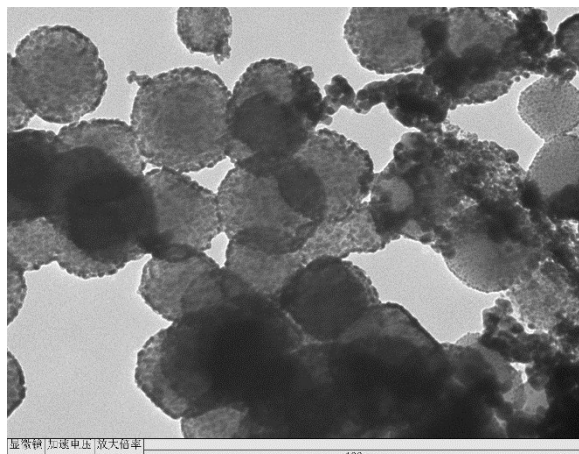

Figure 3. TEM image of  $\text{Co}_3[\text{Co}(\text{CN})_6]_2@Pd$  NPs.

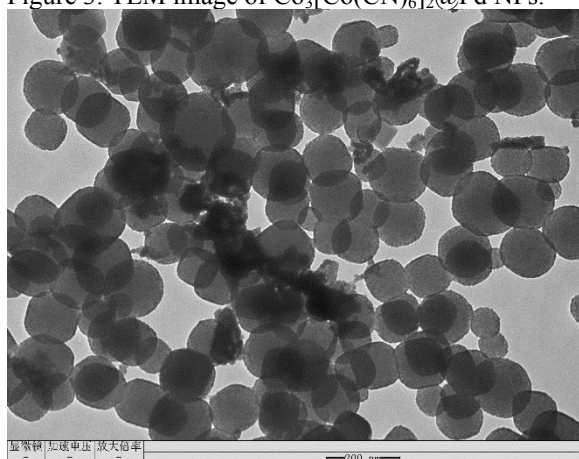

Figure 4. TEM image of large scale  $\text{Pd-Co}_3[\text{Co}(\text{CN})_6]_2$  NPs.

#### Synthesis of $\text{Co}_3[\text{Co}(\text{CN})_6]_2@Pd$ NPs

0.01 g of  $\text{Co}_3[\text{Co}(\text{CN})_6]_2$  was dissolved in 20 ml water solution. 0.3 g lysine was added to solution with stirring 30 mins, then 10 ml palladium chloride water solution (1 g/L) was slowly added into the above mixture solution followed by 1 ml 0.1 M  $\text{NaBH}_4$  solution was added to the solution quickly. About half hour later, the solid products were collected by centrifuging and were washed with water several times. The products were dried in vacuum.

#### REFERENCES

- (1) S. Xu, K. Song, T. Li and B. Tan, *J. Mater. Chem. A*, 2015, **3**, 1272.
- (2) N. Huang, Y. Xu and D. Jiang, *Sci. Rep.*, 2014, **4**, 7228
- (3) J.-Y. Lee, D. Ghosh, J.-Y. Lee, S.-S. Wu, C.-H. Hu, S.-D. Liu and H. M. Lee, *Organometallics*, 2014, **33**, 6481.
- (4) M. I. Burrucco, M. Mora, C. Jiménez-Sanchidrián and J. R. Ruiz, *Appl. Catal., A*, 2014, **485**, 196.
- (5) H. Peng, Y.-Q. Chen, S.-L. Mao, Y.-X. Pi, Y. Chen, Z.-Y. Lian, T. Meng, S.-H. Liu and G.-A. Yu, *Org. Biomol. Chem.*, 2014, **12**, 6944.
- (6) J.-T. Lu, J. C. Y. Lin, M.-C. Lin, N. D. Khupse and I. J. B. Lin, *Langmuir*, 2014, **30**, 10440.
- (7) S. J. Sabounchei and A. Hashemi, *Inorg. Chem. Commun.*, 2014, **47**, 123.
- (8) M. Micksch, M. Tenne and T. Strassner, *Organometallics*, 2014, **33**, 3966.
- (9) F. Wang, J. Mielby, F. H. Richter, G. Wang, G. Prieto, T. Kasama, C. Weidenthaler, H.-J. Bongard, S. Kegnaes, A. Fürstner and F. Schüth, *Angew. Chem. Int. Edit.*, 2014, **53**, 8645.
- (10) L. Chen, S. Rangan, J. Li, H. Jiang and Y. Li, *Green Chem.*, 2014, **16**, 3978.
- (11) M. Teci, E. Brenner, D. Matt, C. Gourlaouen and L. Toupet, *Dalton Trans*, 2014, **43**, 12251.
- (12) J. H. Park, F. Raza, S.-J. Jeon, H.-I. Kim, T. W. Kang, D. Yim and J.-H. Kim, *Tetrahedron Lett.*, 2014, **55**, 3426.
- (13) A. Shen, C. Ni, Y.-C. Cao, H. Zhou, G.-H. Song and X.-F. Ye, *Tetrahedron Lett.*, 2014, **55**, 3278.
- (14) S. Çekirdek, S. Yaşar and İ. Özdemir, *Appl. Organomet. Chem.*, 2014, **28**, 423.
- (15) L. Monnerau, H. El Moll, D. Sémeril, D. Matt and L. Toupet, *Eur. J. Inorg. Chem.*, 2014, **2014**, 1364.
- (16) X. Le, Z. Dong, Y. Liu, Z. Jin, T.-D. Huy, M. Le and J. Ma, *J. Mater. Chem. A*, 2014, **2**, 19696.

(17) P. Li, P.-P. Huang, F.-F. Wei, Y.-B. Sun, C.-Y. Cao and W.-G. Song, *J. Mater. Chem. A*, 2014, **2**, 12739.
